# Supplementary material
Source: PubMed Central journal article supplement (PMC7668289)
Supplement: NIHMS1641571-supplement-Supplement.pdf [file NIHMS1641571-supplement-Supplement.pdf]

# AEROSOL–CLOUD–METEOROLOGY INTERACTION AIRBORNE FIELD INVESTIGATIONS

Using Lessons Learned from the U.S. West Coast  
in the Design of ACTIVATE off the U.S. East Coast

ARMIN SOROOSHIAN, BRUCE ANDERSON, SUSANNE E. BAUER, RACHEL A. BRAUN, BRIAN CAIRNS,  
EWAN CROSBIE, HOSSEIN DADASHAZAR, GLENN DISKIN, RICHARD FERRARE, RICHARD C. FLAGAN,  
JOHNATHAN HAIR, CHRIS HOSTETLER, HAFLIDI H. JONSSON, MARY M. KLEB, HONGYU LIU,  
ALEXANDER B. MACDONALD, ALLISON MCCOMISKEY, RICHARD MOORE, DAVID PAINEMAL,  
LYNN M. RUSSELL, JOHN H. SEINFELD, MICHAEL SHOOK, WILLIAM L. SMITH JR., KENNETH THORNHILL,  
GEORGE TSELILOUDIS, HAILONG WANG, XUBIN ZENG, BO ZHANG, LUKE ZIEMBA, AND PAQUITA ZUIDEMA

This document is a supplement to “Aerosol–Cloud–Meteorology Interaction Airborne Field Investigations: Using Lessons Learned from the U.S. West Coast in the Design of ACTIVATE off the U.S. East Coast,” Armin Sorooshian, Bruce Anderson, Susanne E. Bauer, Rachel A. Braun, Brian Cairns, Ewan Crosbie, Hossein Dadashazar, Glenn Diskin, Richard Ferrare, Richard C. Flagan, Johnathan Hair, Chris Hostetler, Hafliði H. Jonsson, Mary M. Kleb, Hongyu Liu, Alexander B. MacDonald, Allison McComiskey, Richard Moore, David Painemal, Lynn M. Russell, John H. Seinfeld, Michael Shook, William L. Smith Jr., Kenneth Thornhill, George Tselioudis, Hailong Wang, Xubin Zeng, Bo Zhang, Luke Ziemba, and Paquita Zuidema (*Bull. Amer. Meteor. Soc.*, **100**, 1511–1528) • ©2019 American Meteorological Society • *Corresponding author*: Armin Sorooshian, armin@email.arizona.edu • DOI:10.1175/BAMS-D-18-0100.2

**TABLE ES1. Summary of instrument payload during the Center for Interdisciplinary Remotely-Piloted Aircraft Studies (CIRPAS) Twin Otter campaigns relative to the two aircraft being deployed during the Aerosol Cloud meTEorology Interactions oVer the western ATlantic Experiment (ACTIVATE). Acronyms: CPC = Condensation Particle Counter; SMPS = Scanning Mobility Particle Sizer; PCASP = Passive Cavity Aerosol Spectrometer Probe; SP2 = Single Particle Soot Photometer; WIBS = Wideband Integrated Bioaerosol Sensor; CAPS = Cloud, Aerosol, and Precipitation Spectrometer; FSPP = Forward Scattering Spectrometer Probe; CDP = Cloud Droplet Probe; CIP = Cloud Imaging Probe; AC3 = Axial Cyclone Cloud Water Collector; LAS = Laser Aerosol Spectrometer; PILS = Particle-Into-Liquid Sampler; LWP = Liquid Water Path; WVP = Water Vapor Path; HSRL = High Spectral Resolution Lidar; RSP = Research Scanning Polarimeter; PAMR = Profiling Airborne Microwave Radiometer; TSI = TSI, Incorporated; DMT = Droplet Measurement Technologies; BMI = Brechtel Manufacturing Incorporated; LGR = Los Gatos Research; 2B Tech = 2B Technologies.**

| California campaigns                                   |                                                                      | ACTIVATE                                                  |                                                    |                                                                        |            |
|--------------------------------------------------------|----------------------------------------------------------------------|-----------------------------------------------------------|----------------------------------------------------|------------------------------------------------------------------------|------------|
| Twin Otter                                             |                                                                      | HU-25 Falcon                                              |                                                    | B-200 King Air                                                         |            |
| Measured parameter                                     | Instrument                                                           | Measured parameter                                        | Instrument                                         | Retrieved parameter                                                    | Instrument |
| <b>Aerosols</b>                                        |                                                                      |                                                           |                                                    | <b>Remote sensing</b>                                                  |            |
| Total particle concentration                           | 3010 CPC, 3025 CPC (TSI)                                             | Total particle concentration                              | 3776 CPC, 3010 CPC (TSI)                           | Particulate backscatter profiles (355, 532, 1,064 nm)                  | HSRL-2     |
| Total dry aerosol size distributions                   | PCASP (PMS/DMT), SMPS (TSI)                                          | Nonvolatile (350°C) particle concentration                | 3010 CPC (TSI), thermal denuder                    | Particulate extinction profiles (355, 532 nm)                          |            |
| Black carbon                                           | SP2 (DMT)                                                            | Total and nonvolatile dry aerosol size distributions      | SMPS, LAS (TSI)                                    | Particle depolarization (355, 532, 1,064 nm)                           |            |
| Nonrefractory chemically resolved mass concentration   | HR-ToF-AMS (Aerodyne)                                                | Dry scattering coefficient (450, 550, 700 nm)             | 3563 Nephelometer (TSI)                            | Aerosol optical depth (355, 532 nm)                                    |            |
| Water-soluble aerosol chemical composition             | PILS (BMI) collection coupled to offline chemistry                   | $f(RH)$ for scattering (450, 550, 700 nm)                 | 3563 Nephelometer (TSI), 80% humidification        | Mixed-layer height                                                     |            |
| CCN concentration and spectra                          | CCN spectrometer (DMT)                                               | Aerosol absorption (467, 530, 660 nm)                     | Tricolor Absorption Photometer (BMI)               | Qualitative aerosol type                                               |            |
| Primary biological aerosol particles                   | WIBS-4 (DMT)                                                         | Nonrefractory chemically resolved mass concentration      | HR-ToF-AMS (Aerodyne)                              | Effective radius, number/surface/volume concentration                  |            |
|                                                        |                                                                      | Water-soluble aerosol chemical composition                | PILS (BMI) collection coupled to offline chemistry | Cloud-top height and extinction                                        |            |
|                                                        |                                                                      | CCN concentration and spectra                             | CCN spectrometer (DMT)                             | Cloud-top lidar ratio (extinction-to backscatter)                      |            |
| <b>Clouds</b>                                          |                                                                      |                                                           |                                                    | Aerosol optical depth for each mode of a bimodal distribution (column) | RSP        |
| Cloud droplet size and liquid water content (LWC)      | CAPS/FSSP/CDP (DMT), Gerber PVM-100A                                 | Cloud droplet size and liquid water content (LWC)         | CDP and CAS (DMT)                                  | Aerosol size: effective radius (column)                                |            |
| Precipitation concentration and size distribution      | CIP (DMT)                                                            | Precipitation concentration and size distribution         | CIP (DMT)                                          | Aerosol size: effective variance (column)                              |            |
| Cloud water chemical composition                       | Modified Mohnen Collector and AC3 (NASA LaRC) with offline chemistry | Cloud water chemical composition                          | AC3 (NASA LaRC) with offline chemistry             | Aerosol single-scattering albedo (column)                              |            |
| Isolation of droplet residual particles                | Counterflow Virtual Impactor (BMI)                                   | Isolation of droplet residual particles                   | Counterflow Virtual Impactor (BMI)                 | Aerosol refractive index (column)                                      |            |
| <b>Meteorological state parameters and trace gases</b> |                                                                      |                                                           |                                                    | Cloud-top effective radius and variance                                |            |
| 3D winds                                               | 5-port pressure system                                               | 3D winds                                                  | 5-port pressure system                             | Cloud mean effective radius                                            |            |
| Temperature                                            | Rosemount 102                                                        | Temperature                                               | Rosemount 102                                      | Cloud optical depth                                                    |            |
| Water vapor                                            | Edgetech hygrometer                                                  | Water vapor                                               | Diode Laser Hygrometer                             | Liquid water path                                                      |            |
| Skin surface temperature                               | Infrared radiation pyrometer (Heitronics)                            |                                                           | Licor 7200                                         | Cloud thickness                                                        |            |
| NO <sub>x</sub>                                        | LGR NO <sub>2</sub> Analyzer                                         |                                                           | Edgetech hygrometer                                | Cloud droplet number concentration                                     |            |
| CO and CO <sub>2</sub>                                 | LGR cavity-enhanced laser absorption                                 | CO and CO <sub>2</sub>                                    | LGR cavity-enhanced laser absorption               | LWP, WVP                                                               | PAMR       |
| O <sub>3</sub>                                         | 2B Tech. absorption monitor                                          | O <sub>3</sub>                                            | 2B Tech, absorption                                |                                                                        |            |
|                                                        |                                                                      | Pressure, temperature, relative humidity, horizontal wind | NRD41 Dropsonde                                    |                                                                        |            |
